# Supplementary material for: Effect of developmental dynamics on WRKY expression in barley with varying phenologies and trichome micromorphologies
Source: Research Square preprint supplement (doi:10.21203/rs.3.rs-7463060/v1), 2025-09-12
Supplement: Supplementary file 1 [file 0a7ad23f41e2cb2e26a22d33.docx]

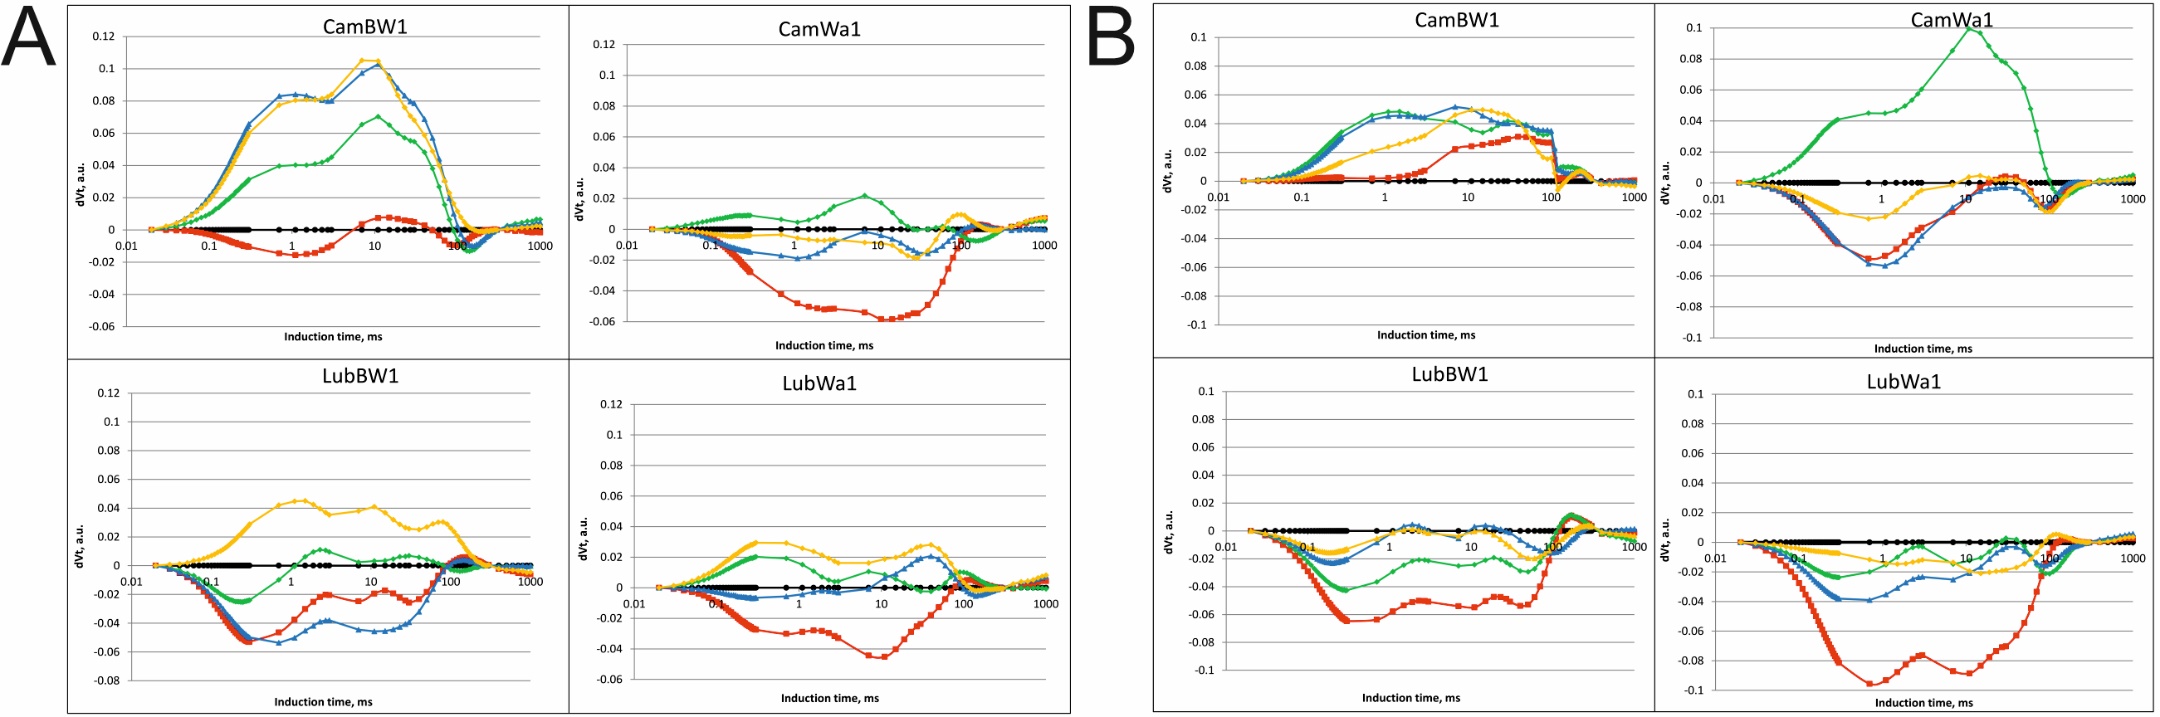


**Figure S5**. Differential curves of ∆Vt (double normalization) of four studied barley genotypes under different stress treatments at two development stages—DP_1 (A), DP_2 (B). The colors in the diagrams represent experimental conditions: **black** – control condition; **red** – MD+F+TR; **green** – MD+F+GA; **blue** – SD+F+TR; **yellow** – SD+F+GA. a.u. - arbitrary units
