# Supplementary material for: Effect of developmental dynamics on WRKY expression in barley with varying phenologies and trichome micromorphologies
Source: Research Square preprint supplement (doi:10.21203/rs.3.rs-7463060/v1), 2025-09-12
Supplement: Supplementary file 4 [file 2adb382bf38e199762778862.docx]

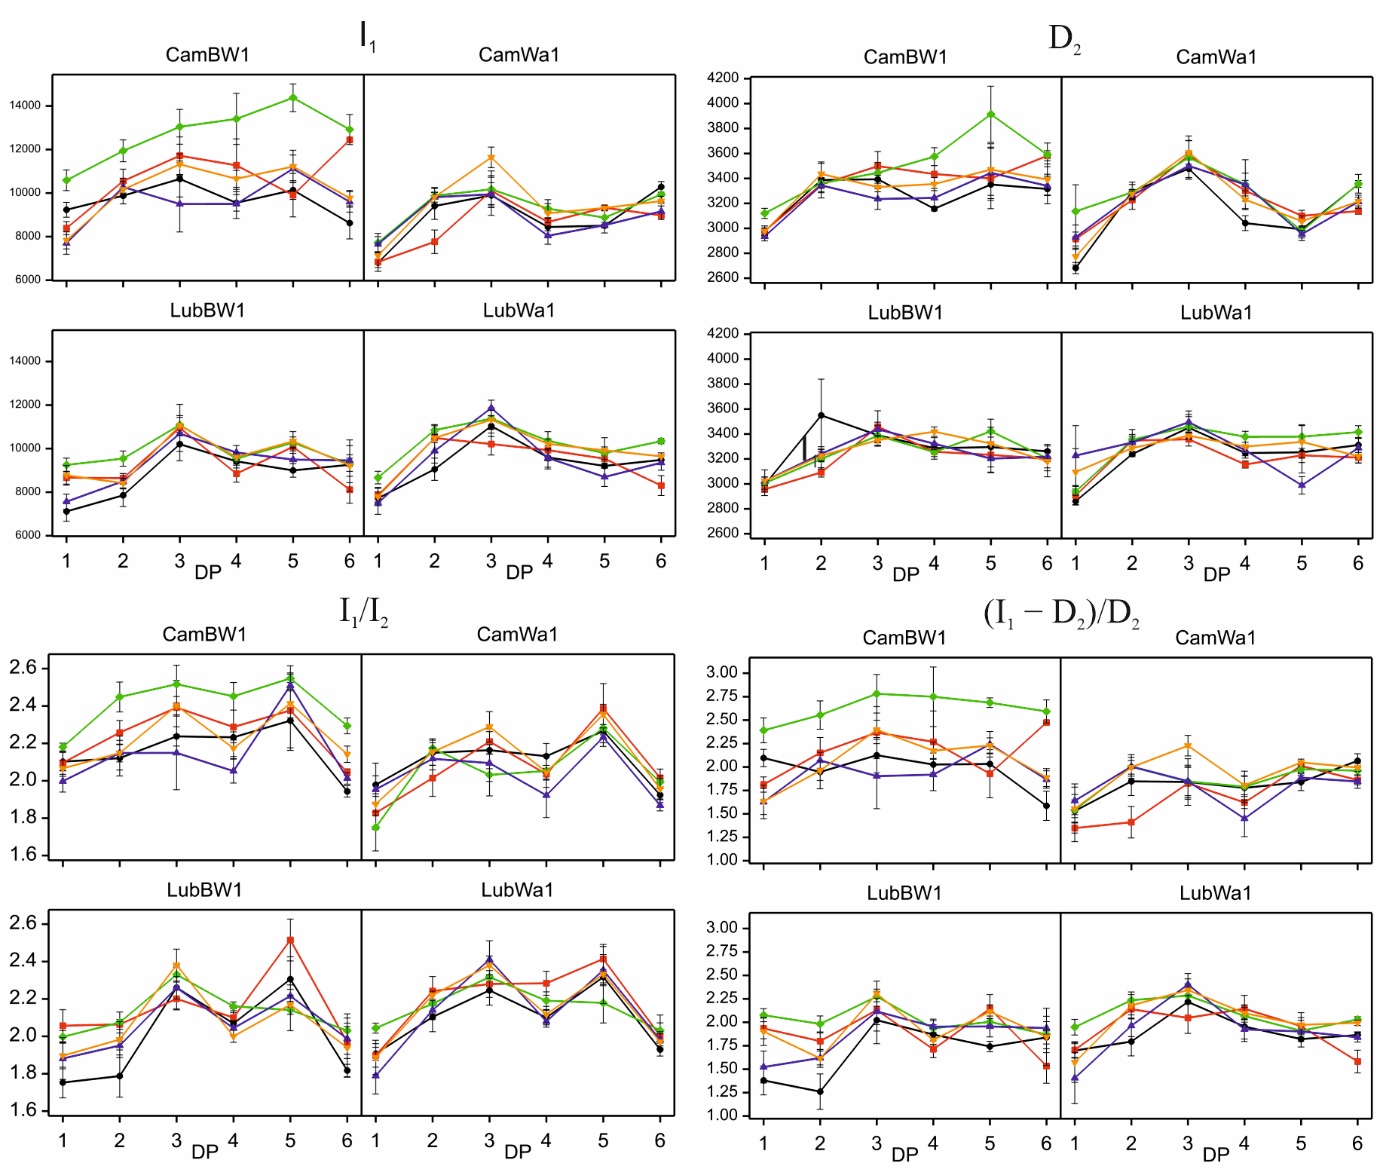


**Figure S9.** Delayed fluorescence induction curves of the studied genotypes grown under optimal water conditions and subjected to stress combinations. Data (mean values with standard errors) are presented in arbitrary units. Treatments: **black** – control condition; **red** – MD+F+GA; **green** – MD+F+TR; **purple** – SD+F+GA; **yellow** – SD+F+TR
