# Supplementary material for: Effect of developmental dynamics on WRKY expression in barley with varying phenologies and trichome micromorphologies
Source: Research Square preprint supplement (doi:10.21203/rs.3.rs-7463060/v1), 2025-09-12
Supplement: Supplementary file 5 [file 36400d1bc0782f49006f8da8.docx]

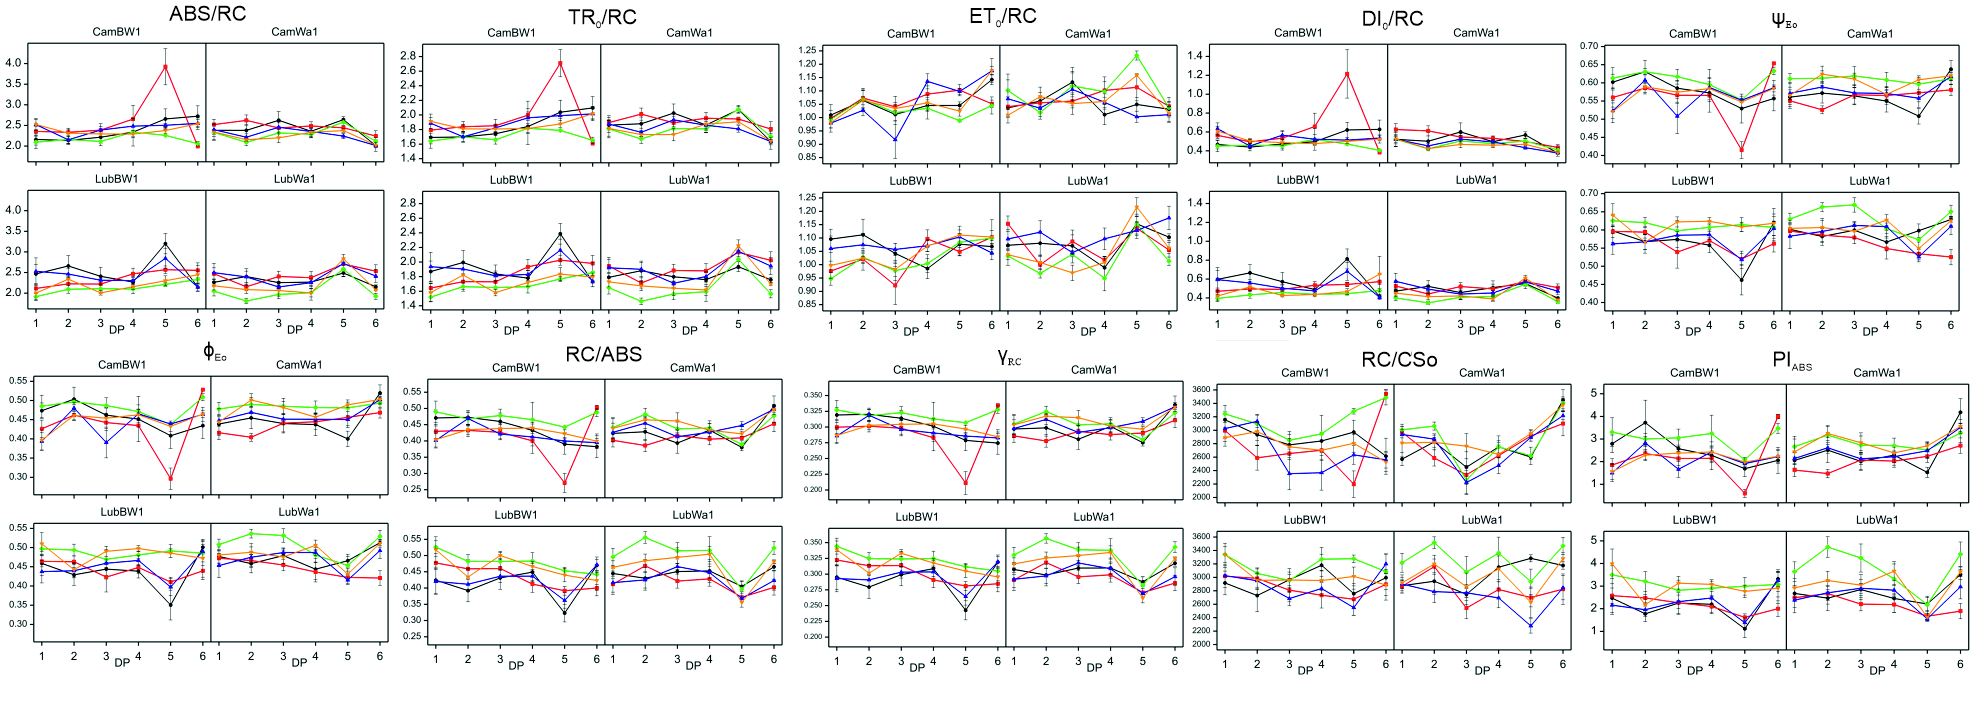
**Figure S8**. The variability of OJIP-derived parameters (measured in six development points - after exposure to drought and subsequent recovery) that characterize PSII functioning in four barley genotypes subjected to different treatments. Data (mean values with standard errors) are presented in arbitrary units. Treatments: **black** – control condition; **red** – MD+F+GA; **green** – MD+F+TR; **purple** – SD+F+GA; **yellow** – SD+F+TR
