# Supplementary material for: Effect of developmental dynamics on WRKY expression in barley with varying phenologies and trichome micromorphologies
Source: Research Square preprint supplement (doi:10.21203/rs.3.rs-7463060/v1), 2025-09-12
Supplement: Supplementary file 6 [file 3a18be337200cf77a92f7ba9.docx]

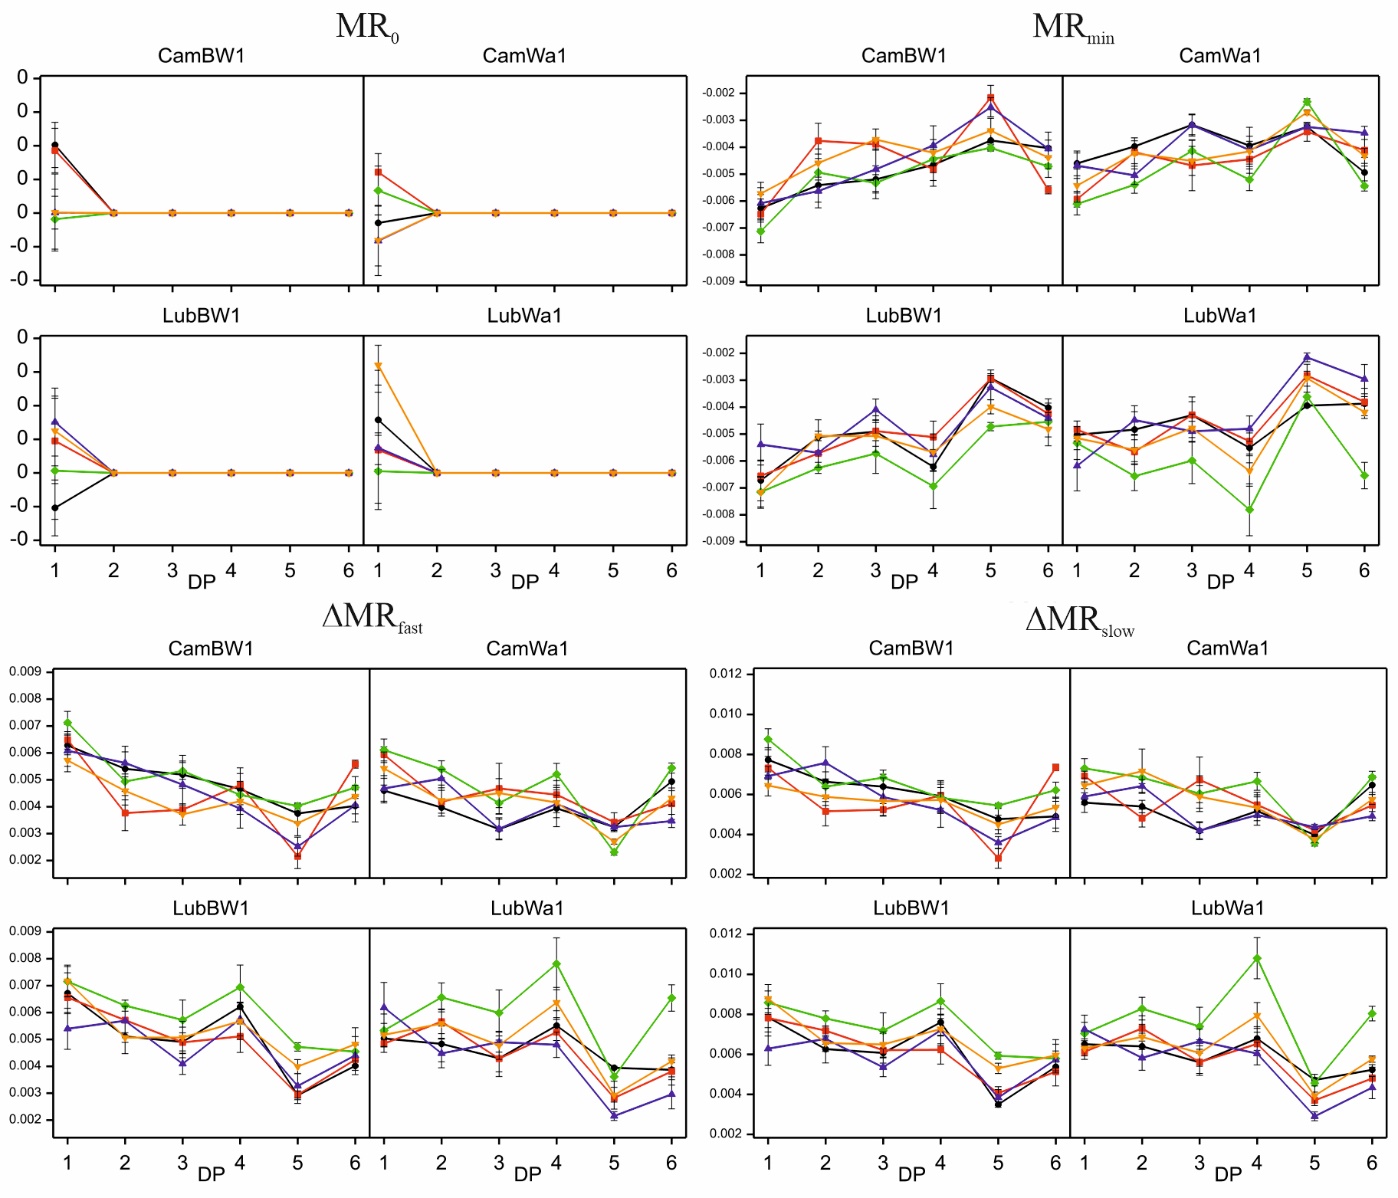


**Figure S10**. Kinetics of modulated light reflection at 820 nm of the studied genotypes grown under optimal water conditions and subjected to stress combinations. Data (mean values with standard errors) are presented in arbitrary units. Treatments: **black** – control condition; **red** – MD+F+GA; **green** – MD+F+TR; **purple** – SD+F+GA; **yellow** – SD+F+TR
