# Supplementary material for: Effect of developmental dynamics on WRKY expression in barley with varying phenologies and trichome micromorphologies
Source: Research Square preprint supplement (doi:10.21203/rs.3.rs-7463060/v1), 2025-09-12
Supplement: Supplementary file 7 [file 6bccf99f0af3ef6cbfbd7c2b.docx]

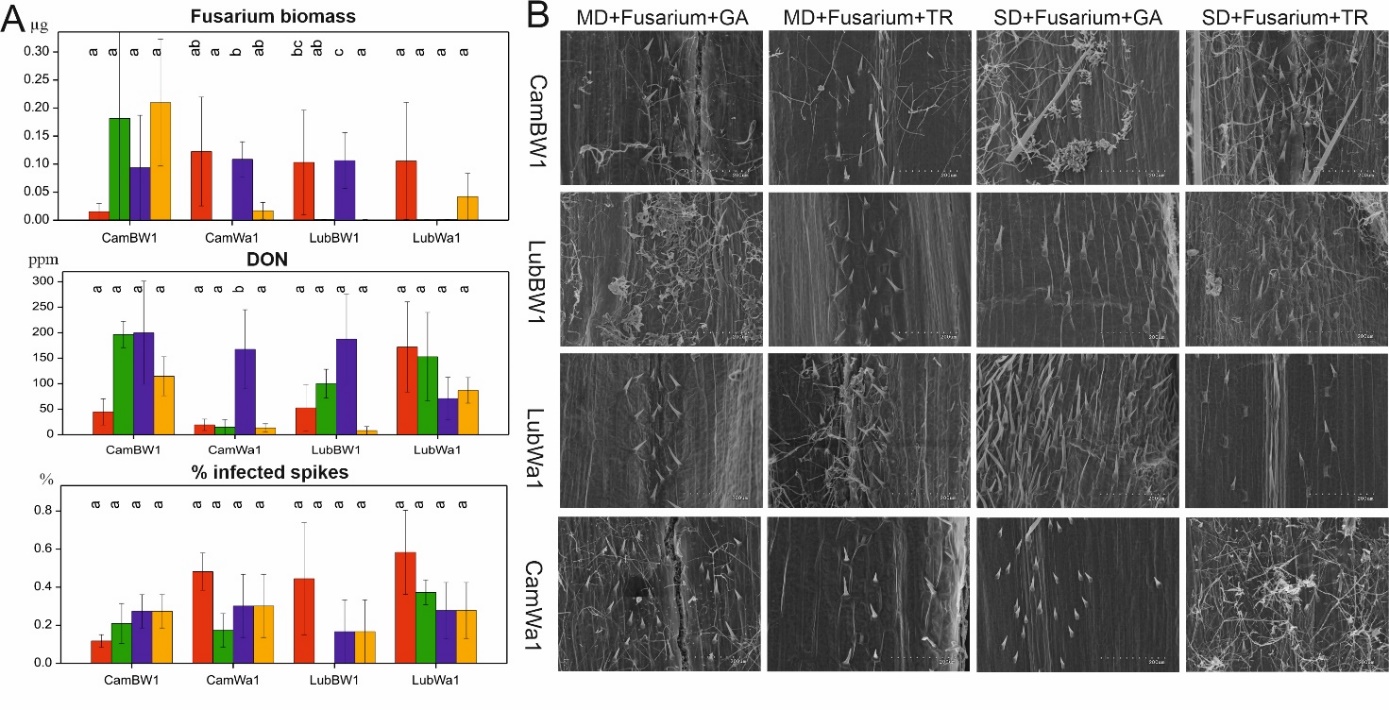


**Figure S3**.The results were obtained fromthe *Fusarium*-induced effect evaluation method. (A) variability of the traits associated with fungal development (Fusarium biomass, % infected spikes, DON) observed for the four genotypes. Letters indicate statistically similar mean values at p < 0.05 according to the Fisher least significant difference test. (B) Scanning electron micrographs of the *F. culmorum* hypnea development observed on the inner side of the chaffs collected from plants subjected to four types of stress conditions. The colors in the diagrams represent experimental conditions: **red** – MD+F+GA; **green** – MD+F+TR; **purple** – SD+F+GA; **yellow** – SD+F+TR
