# Supplementary material for: Effect of developmental dynamics on WRKY expression in barley with varying phenologies and trichome micromorphologies
Source: Research Square preprint supplement (doi:10.21203/rs.3.rs-7463060/v1), 2025-09-12
Supplement: Supplementary file 11 [file aa3955764179c0aa955a8a83.docx]

**
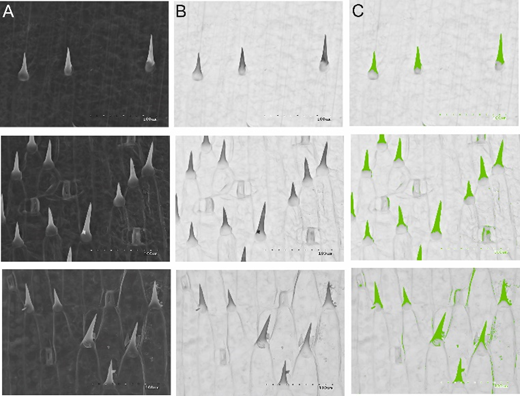
**

**Figure S1**. Image acquisition and processing. The analysis was performed by using scanning electron micrographs at ×100 magnification. Image preprocessing steps: the images were converted from SEM microphotographs (A) to binary images (B); the processed image was subjected to auto calculation commend by Image Analyzing System Motic Images Plus 3.0 (C)
