# Supplementary material for: Effect of developmental dynamics on WRKY expression in barley with varying phenologies and trichome micromorphologies
Source: Research Square preprint supplement (doi:10.21203/rs.3.rs-7463060/v1), 2025-09-12
Supplement: Supplementary file 14 [file d1e678bd5d0e7f28b996bdc3.docx]

**Table S3**. DNA sequences of the gene specific primers

| Gene | Sequence (5’->3’) | Ampl. length (bp) | Melt temp. [°C] | E [%] |
| --- | --- | --- | --- | --- |
| *WRKY34* | F: AAGGAGGAGGGATCGGTTA | 115 | 59 | 107.3 |
| R: AAAACGGTAGCAAGAAGCAA |
| *WRKY51* | F: CCTTCGTTACTGTTACTAGCA | 147 | 62 | 103.2 |
| R: GCTACCATTCACCTTTTCTTC |
| *WRKY70* | F: AGAAATCTGCGTGTTTGCTA | 80 | 62 | 109.6 |
| R: CCCCGCTAAGGCTACTAA |
| *PPR37* | F: AGGACGAGGGCGATTGTA | 110 | 59 | 98.2 |
| R: TAGAGGCTCAGACATTGATTGG |
| *ACT1** | F: GAATGGTCAAGGCTGGTTTCG | 205 | 65 | 100.1 |
| R: TCCATGTCATCCCAGTTGCT |
| *UBI*** | F: TCGCCGTCCTCCAGTTCTAC | 63 | 65 | 109.4 |
| R: CCTTCCTGAGCCTGGTTACCT |

* Gines et al., 2018; DOI: 10.2135/cropsci2017.07.0443

** Rapacz et al., 2012; DOI: 10.1007/s11738-012-0967-1
