# Supplementary material for: Effect of developmental dynamics on WRKY expression in barley with varying phenologies and trichome micromorphologies
Source: Research Square preprint supplement (doi:10.21203/rs.3.rs-7463060/v1), 2025-09-12
Supplement: Supplementary file 17 [file f32c4ce011d117425b4718a8.docx]

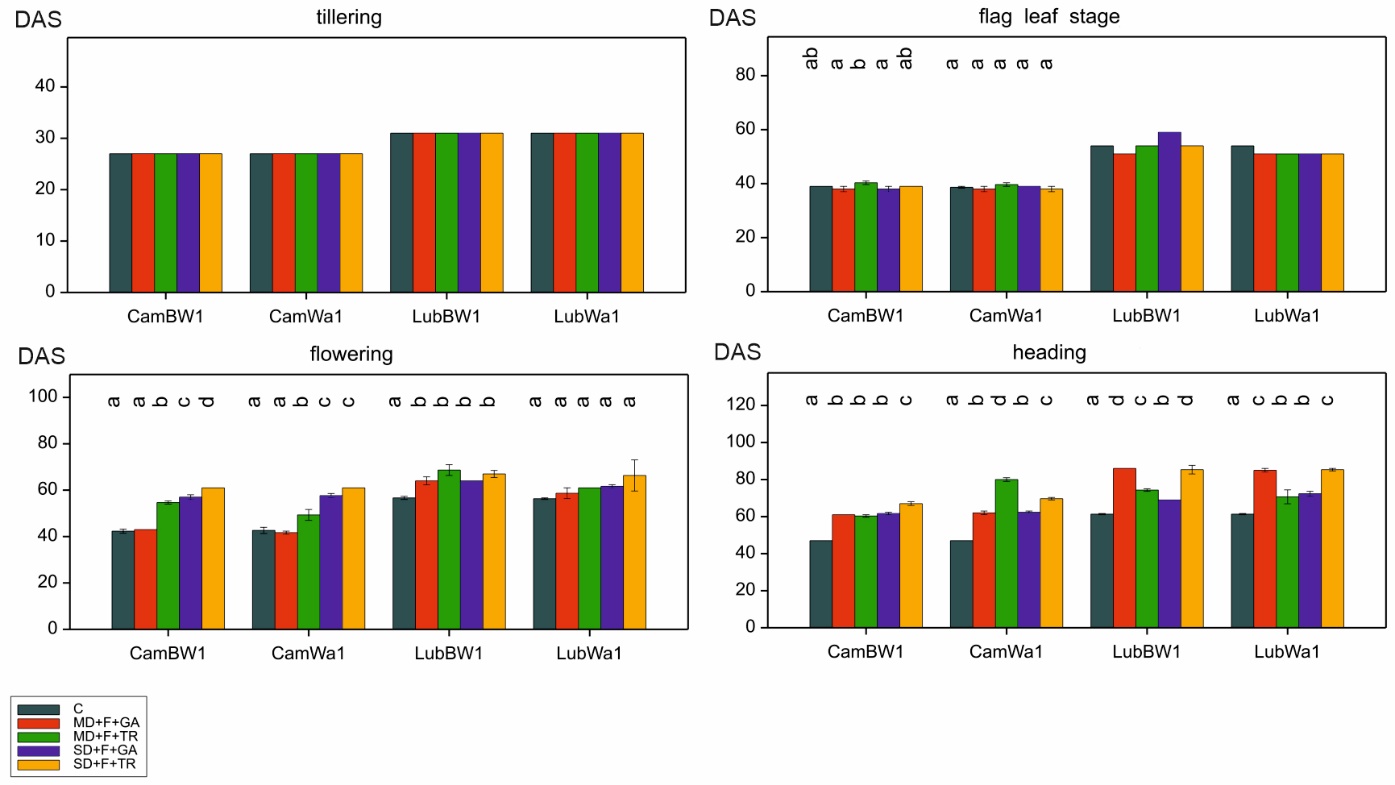


**Figure S2**. Mean values (with standard errors) of phenological traits for the studied genotypes grown under five treatments: control and combinations of drought (MD – mild; SD – severe) and foliar spray (GA – gibberellic acid, TR – trinexapac ethyl), DAS: days after sowing. Letters indicate statistically similar mean values at p < 0.05 according to the Fisher least significant difference test
