# Supplementary material for: Effect of developmental dynamics on WRKY expression in barley with varying phenologies and trichome micromorphologies
Source: Research Square preprint supplement (doi:10.21203/rs.3.rs-7463060/v1), 2025-09-12
Supplement: Supplementary file 18 [file f69c58108eb02551d6ef9368.docx]

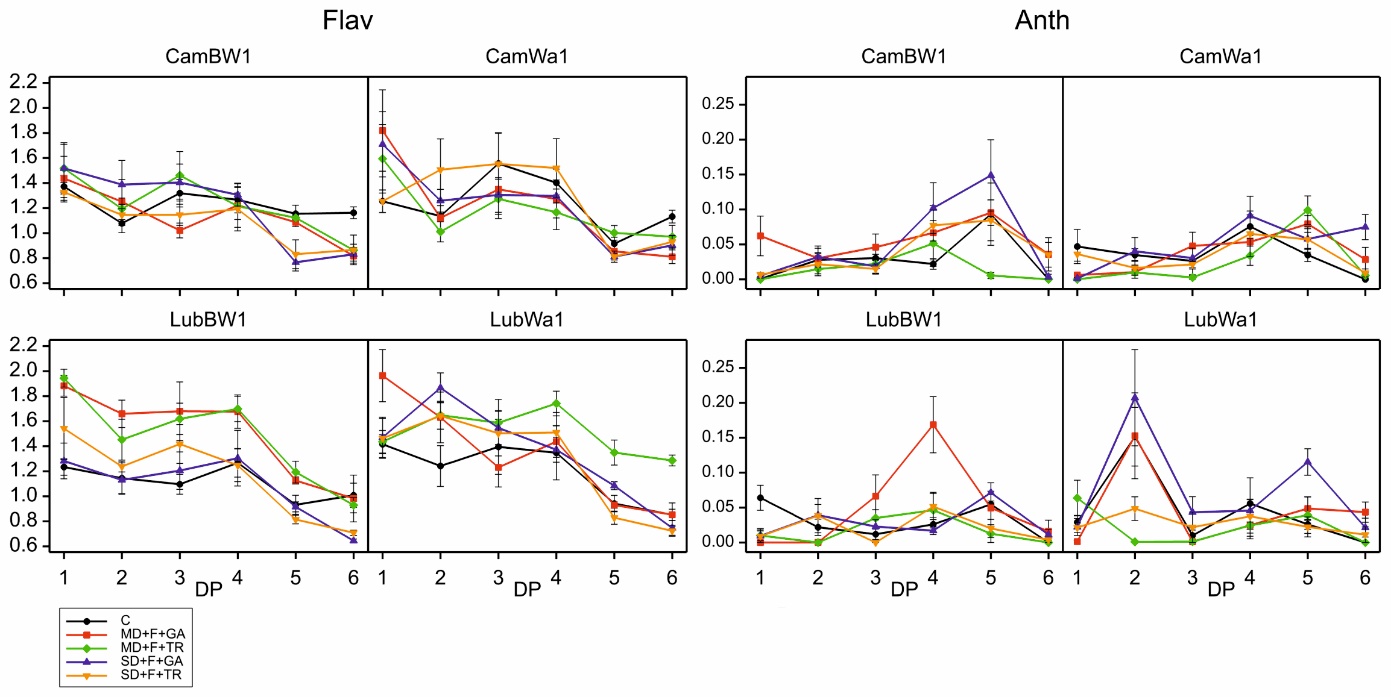


**Figure S11**. Flavonol index (Flav) and anthocyanin index (Anth) (measured in six development points - after exposure to drought and subsequent recovery) of the studied genotypes grown under optimal water conditions and subjected to stress combinations. Data (mean values with standard errors) are presented in arbitrary units
