# Supplementary material for: Effect of developmental dynamics on WRKY expression in barley with varying phenologies and trichome micromorphologies
Source: Research Square preprint supplement (doi:10.21203/rs.3.rs-7463060/v1), 2025-09-12
Supplement: Supplementary file 19 [file f959f920574cd0ca645c8430.docx]

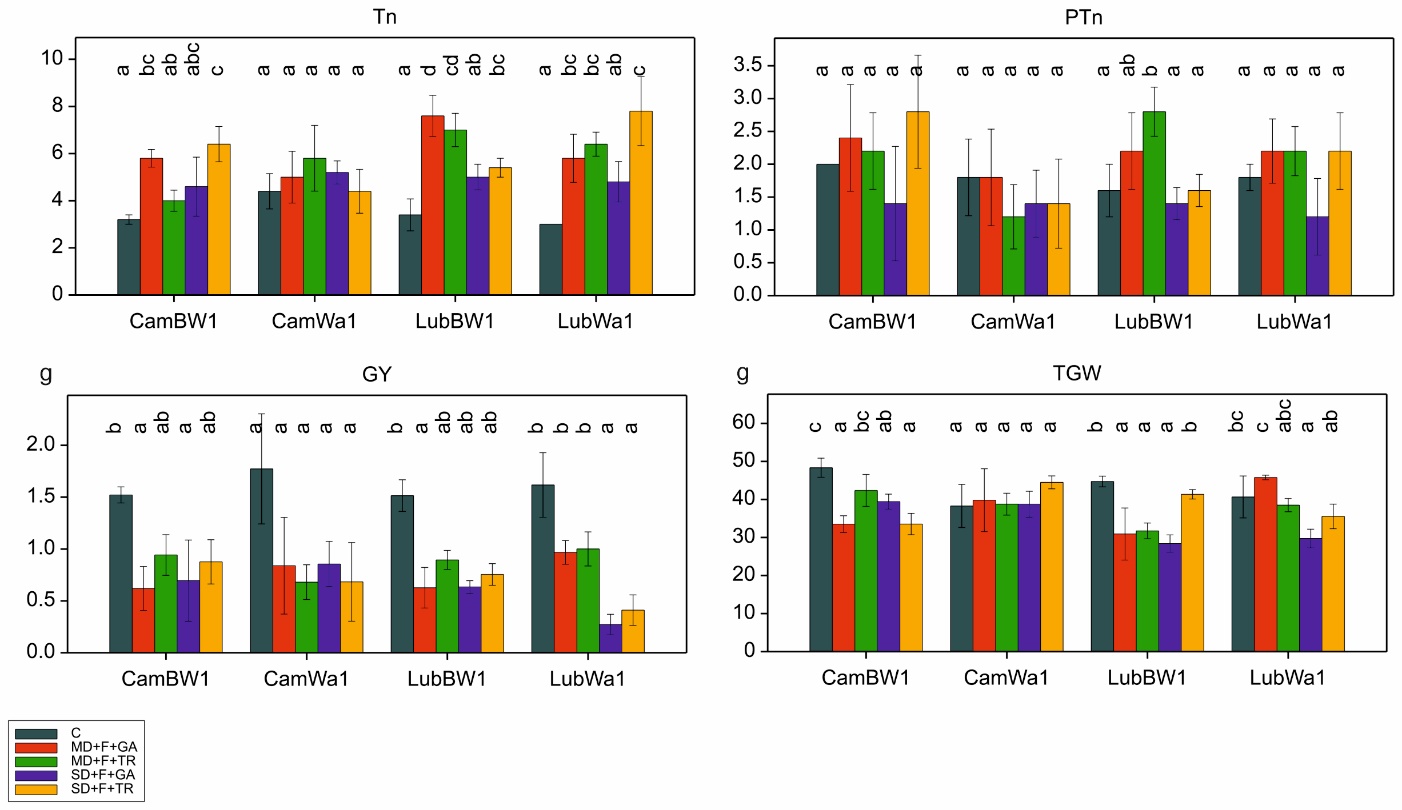


**Figure S12**. Distribution of traits associated with tillering process and grain yield. Letters indicate statistically similar mean values at p < 0.05 according to the Fisher least significant difference test
